# Supplementary material
Source: Springer Nature journal article supplement (https://www.springermedizin.de/resource/supplementary/12890_2010_252_MOESM5_ESM.pdf/9504796)

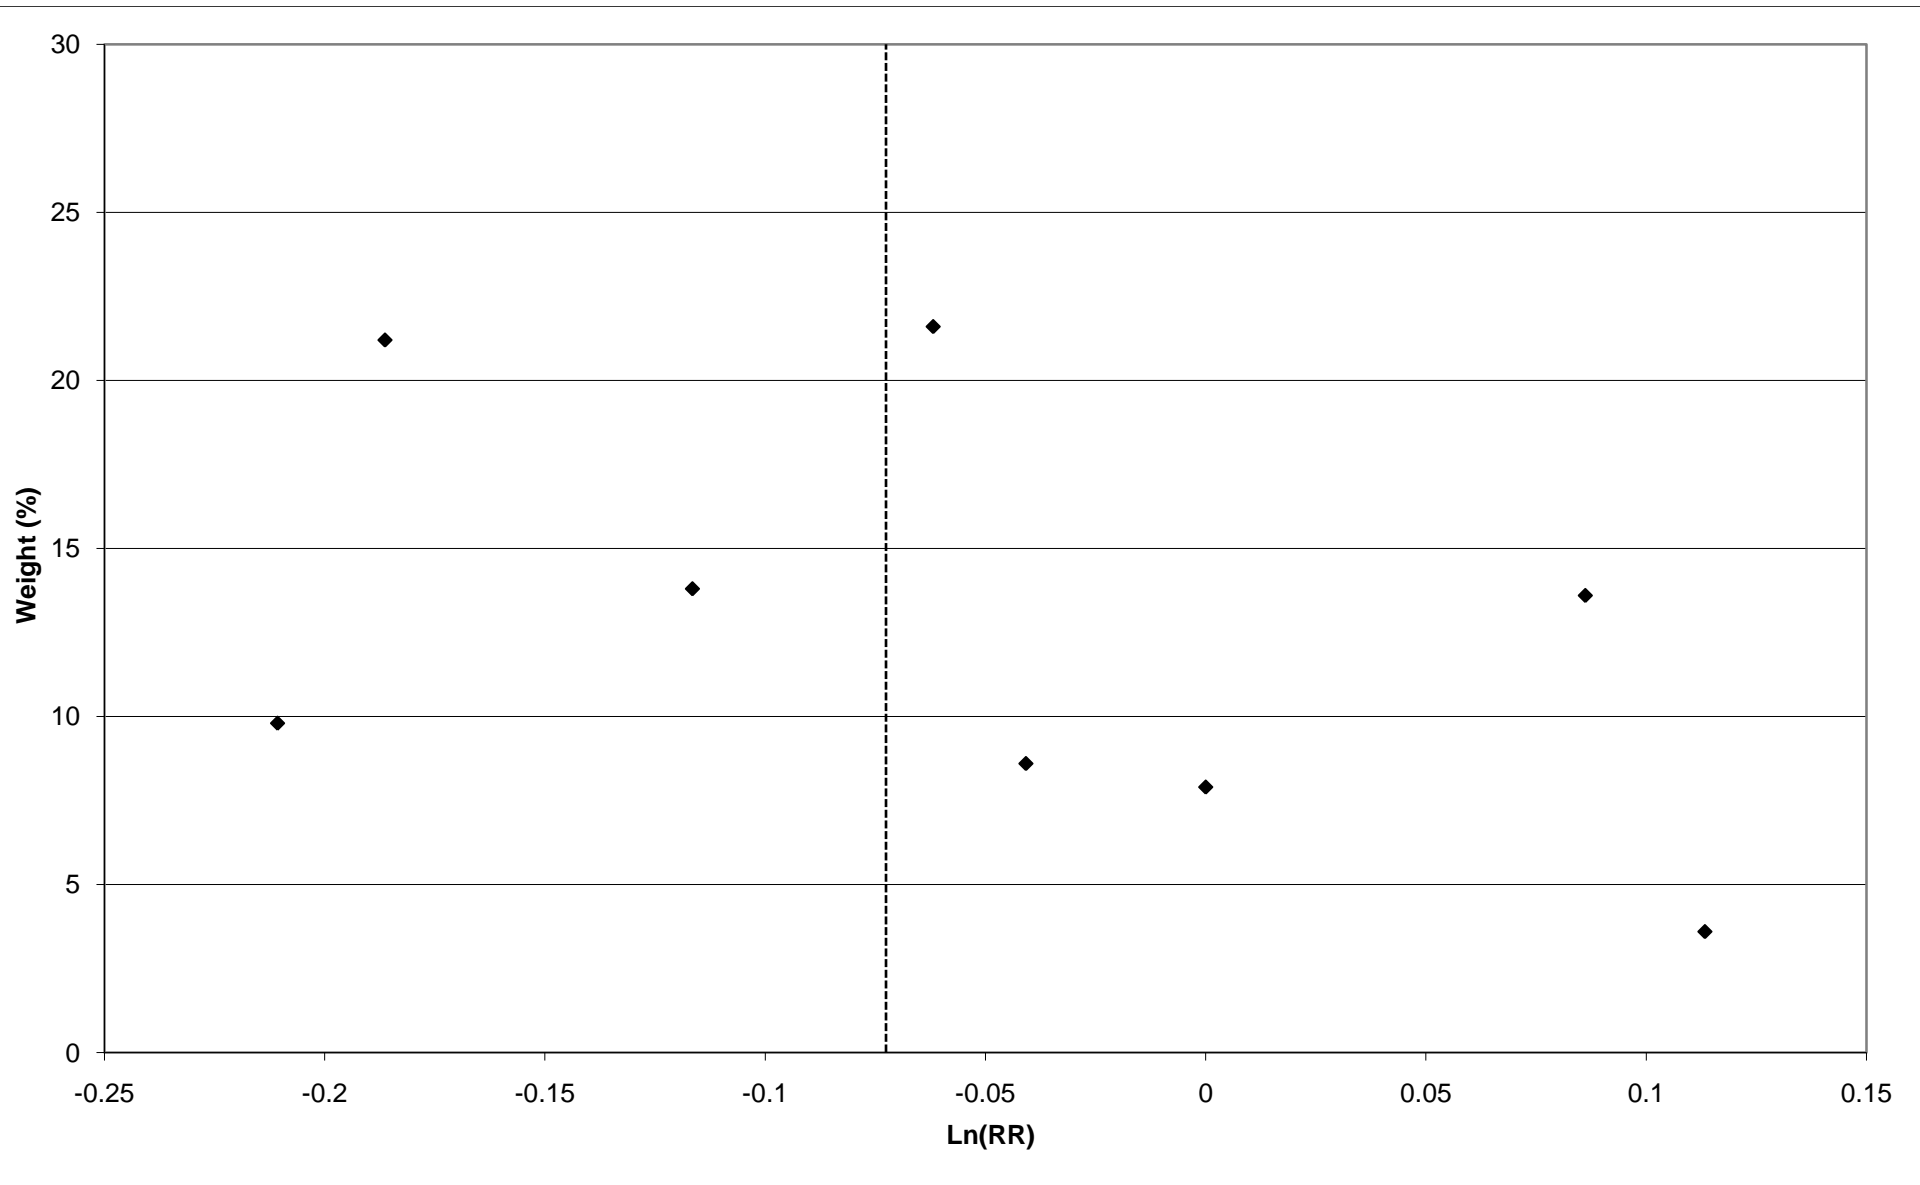

Supplement: MOESM5 [file 9504796]
